# Hypoxia Due to Cardiac Arrest Induces a Time-Dependent Increase in Serum Amyloid $\beta$ Levels in Humans

Henrik Zetterberg<sup>1\*</sup>, Erik Mörtberg<sup>2</sup>, Linan Song<sup>3</sup>, Lei Chang<sup>3</sup>, Gail K. Provuncher<sup>3</sup>, Purvish P. Patel<sup>3</sup>, Evan Ferrell<sup>3</sup>, David R. Fournier<sup>3</sup>, Cheuk W. Kan<sup>3</sup>, Todd G. Campbell<sup>3</sup>, Ray Meyer<sup>3</sup>, Andrew J. Rivnak<sup>3</sup>, Brian A. Pink<sup>3</sup>, Kaitlin A. Minnehan<sup>3</sup>, Tomasz Piech<sup>3</sup>, David M. Rissin<sup>3</sup>, David C. Duffy<sup>3</sup>, Sten Rubertsson<sup>2</sup>, David H. Wilson<sup>3</sup>, Kaj Blennow<sup>1</sup>

**1** Department of Psychiatry and Neurochemistry, The Sahlgrenska Academy at the University of Gothenburg, Mölndal, Sweden, **2** Department of Surgical Sciences, Anaesthesia and Intensive Care, Uppsala University, Uppsala, Sweden, **3** Quanterix Corporation, Cambridge, Massachusetts, United States of America

## Abstract

Amyloid  $\beta$  (A $\beta$ ) peptides are proteolytic products from amyloid precursor protein (APP) and are thought to play a role in Alzheimer disease (AD) pathogenesis. While much is known about molecular mechanisms underlying cerebral A $\beta$  accumulation in familial AD, less is known about the cause(s) of brain amyloidosis in sporadic disease. Animal and postmortem studies suggest that A $\beta$  secretion can be up-regulated in response to hypoxia. We employed a new technology (Single Molecule Arrays, SiMoA) capable of ultrasensitive protein measurements and developed a novel assay to look for changes in serum A $\beta$ 42 concentration in 25 resuscitated patients with severe hypoxia due to cardiac arrest. After a lag period of 10 or more hours, very clear serum A $\beta$ 42 elevations were observed in all patients. Elevations ranged from approximately 80% to over 70-fold, with most elevations in the range of 3–10-fold (average approximately 7-fold). The magnitude of the increase correlated with clinical outcome. These data provide the first direct evidence in living humans that ischemia acutely increases A $\beta$  levels in blood. The results point to the possibility that hypoxia may play a role in the amyloidogenic process of AD.

**Citation:** Zetterberg H, Mörtberg E, Song L, Chang L, Provuncher GK, et al. (2011) Hypoxia Due to Cardiac Arrest Induces a Time-Dependent Increase in Serum Amyloid  $\beta$  Levels in Humans. PLoS ONE 6(12): e28263. doi:10.1371/journal.pone.0028263

**Editor:** Stephen D. Ginsberg, Nathan Kline Institute and New York University School of Medicine, United States of America

**Received:** September 1, 2011; **Accepted:** November 4, 2011; **Published:** December 14, 2011

**Copyright:** © 2011 Zetterberg et al. This is an open-access article distributed under the terms of the Creative Commons Attribution License, which permits unrestricted use, distribution, and reproduction in any medium, provided the original author and source are credited.

**Funding:** This study was supported by grants from the Swedish Research Council (K2010-63P-21562-01-4, K2011-61X-20401-05-6), the Söderberg Foundation, Alzheimer's Association and Swedish State Support for Clinical Research. The funders had no role in study design, data collection and analysis, decision to publish, or preparation of the manuscript.

**Competing Interests:** The authors have read the journal's policy and have the following conflicts: Drs. Song, Chang, Provuncher, Patel, Ferrell, Fournier, Kan, Campbell, Meyer, Rivnak, Pink, Minnehan, Piech, Rissin, Duffy and Wilson are employees at Quanterix Corporation. This does not alter the authors' adherence to all the PLoS ONE policies on sharing data and materials. There are no relevant patents and products in relation to this. The other authors have no competing interests.

\* E-mail: henrik.zetterberg@clinchem.gu.se

## Introduction

Amyloid  $\beta$  (A $\beta$ ) peptides are produced by many cell types in the body but the expression is particularly high in the brain. Accumulation of A $\beta$  in the form of extracellular plaques is a neuropathological hallmark of Alzheimer disease (AD) and thought to play a central role in the neurodegenerative process [1]. In familial AD, brain amyloidosis is caused by mutations in the genes encoding amyloid precursor protein (APP) or  $\gamma$ -secretase; the enzyme complex that together with  $\beta$ -secretase is responsible for producing A $\beta$  from APP [2]. However, very little is known about what drives A $\beta$  accumulation in the brains of patients with sporadic AD.

Mounting evidence suggest that cerebral hypoxia may play a role in the pathogenesis of sporadic AD. Epidemiological data show that cerebrovascular risk factors, such as hypertension, hyperhomocysteinemia and hypercholesterolemia, increase the risk of AD [3,4,5,6]. Mild transient brain hypoperfusion in AD transgenic mice results in an acute increase in A $\beta$  secretion through induced  $\beta$ -secretase (BACE1) protein expression [7], which is regulated by hypoxia inducible factor 1- $\alpha$  (HIF1- $\alpha$ ) [8]. In a similar manner, bilateral

carotid occlusion in rats results in time-dependent accumulation of oligomeric A $\beta$  in the hippocampus [9]. In humans, a marked increase in A $\beta$  expression, peaking at 4 days post-stroke, is found in pyramidal neurons in the hippocampus of patients who died from ischemic stroke [10]. Finally, a neuropathological study shows that in patients resuscitated after cardiac arrest who died 3–36 days later, APP over-expression is found in cortical and subcortical neurons together with non-fibrillar A $\beta$  plaques in the neuropil [11].

To further elucidate the link between hypoxia and A $\beta$  production in living humans, we employed a new technology (Single Molecule Arrays, SiMoA) capable of ultrasensitive protein measurements [12,13] to look for changes in serum A $\beta$ 42 concentration in serial blood samples from patients following cardiac arrest and resuscitation.

## Methods

### Ethics statement

The study was performed at the general intensive care unit at Uppsala University Hospital, Sweden, and approved by the

Human Ethics Committee of Uppsala, Sweden. Written consent for participation was obtained from a legal next of kin, and later from survivors, when considered competent.

## Patients

Twenty-five unconscious patients (8 women, 17 men, age range 25–85 years, mean 62 years) with cardiac arrest were resuscitated with restoration of spontaneous circulation (ROSC). Patients exhibited systolic blood pressure  $>80$  mmHg after ROSC and a Glasgow Coma Scale  $\leq 7$ . Hypothermia treatment to a body temperature of 32–34°C for 24 hours, ventilation, and pharmacologic support were administered immediately after resuscitation as described [14]. All patients received an arterial line in the radial or femoral artery for blood sampling. Serial blood samples were collected, starting as soon as possible in the emergency phase (within 6 h after cardiac arrest), and continuing at 1, 2, 6, 12, 24, 48, 72, 96, and 108 h after cardiac arrest. Serum aliquots were frozen at  $-70^{\circ}\text{C}$  until analysis.

Patient outcome was assessed using the Glasgow-Pittsburgh cerebral performance category (CPC) scale at discharge from the intensive care unit and 6 months later [15]. The CPC scale ranges from 1 to 5, with 1 representing mildest possible neurological deficit (patient is able to return to work), and 4–5 representing the most severe deficit (vegetative) and death. A CPC of 1 or 2 was considered a good outcome and a CPC score of 3–5 a poor outcome, as described [14]. For patients who died after discharge from the ICU, the better of the two scores was used, as recommended by the Utstein templates [16].

## Arrays

Patient serum samples were measured in triplicate by a novel SiMoA A $\beta$ 42 assay. The technique involves performing a paramagnetic bead-based ELISA, followed by isolation of individual capture beads in arrays of femtoliter-sized reaction wells [13]. Fifty femtoliter reaction wells were prepared as

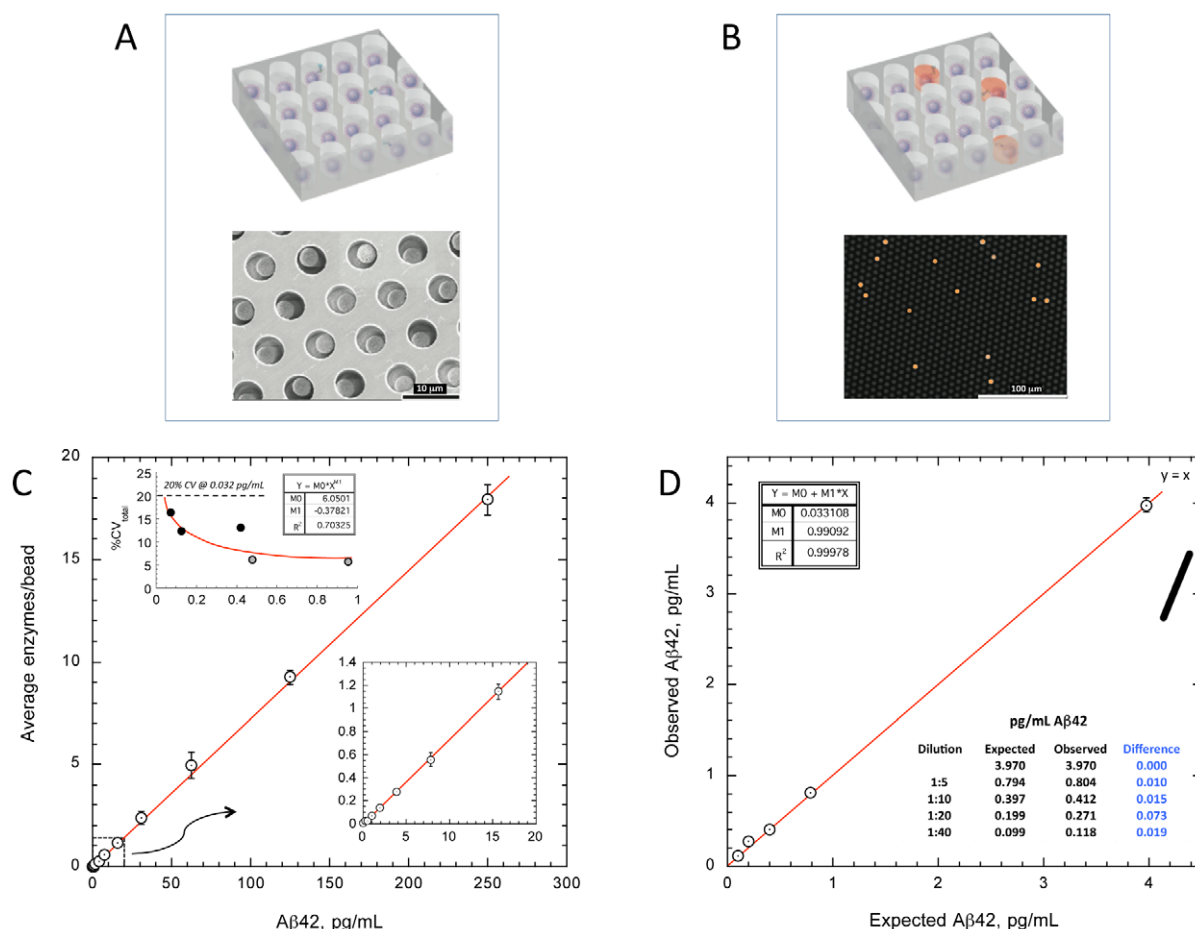

**Figure 1. Assay characteristics.** Arrays of femtoliter-volume wells permit isolation of 2.7 mm capture beads from a standard bead-based ELISA (A), enabling exquisite sensitivity to enzyme label by preventing fluorescent product from diffusing away into a bulk solution. At very low concentrations of A $\beta$ 42, beads contain either a single labeled immunocomplex or no complexes, giving rise to digital signal output corresponding to single molecules (B). Simultaneous counting of active wells across an array statistically powers estimates of average enzymes/bead. (C) Dose-response of digital immunoassay for A $\beta$ 42 ( $n=3$ ). Y-axis refers to average number of enzyme labels per individual microbead captured in the array. The concentration of label is reduced relative to standard immunoassays, resulting in improved signal:background at very low A $\beta$ 42 concentration. Assay calibrators were purified A $\beta$ 42 (Merck) in PBS/BSA. (C inset) Limit of quantification (LoQ) was estimated from total coefficients of variation (CV) from five low panel members (spiked PBS/BSA panels, grey circles, and immunodepleted plasma, black circles) assayed repeatedly across five days. The A $\beta$ 42 concentration at which total assay imprecision reached 20% (LoQ) was 0.032 pg/mL. (D) Recovery at extremely low A $\beta$ 42 concentrations was tested by diluting spiked immunodepleted plasma with PBS/BSA zero calibrator ( $n=3$ ). Because samples are pre-diluted 4-fold prior to assay to reduce matrix effects, dilutions include an initial 4-fold dilution. doi:10.1371/journal.pone.0028263.g001

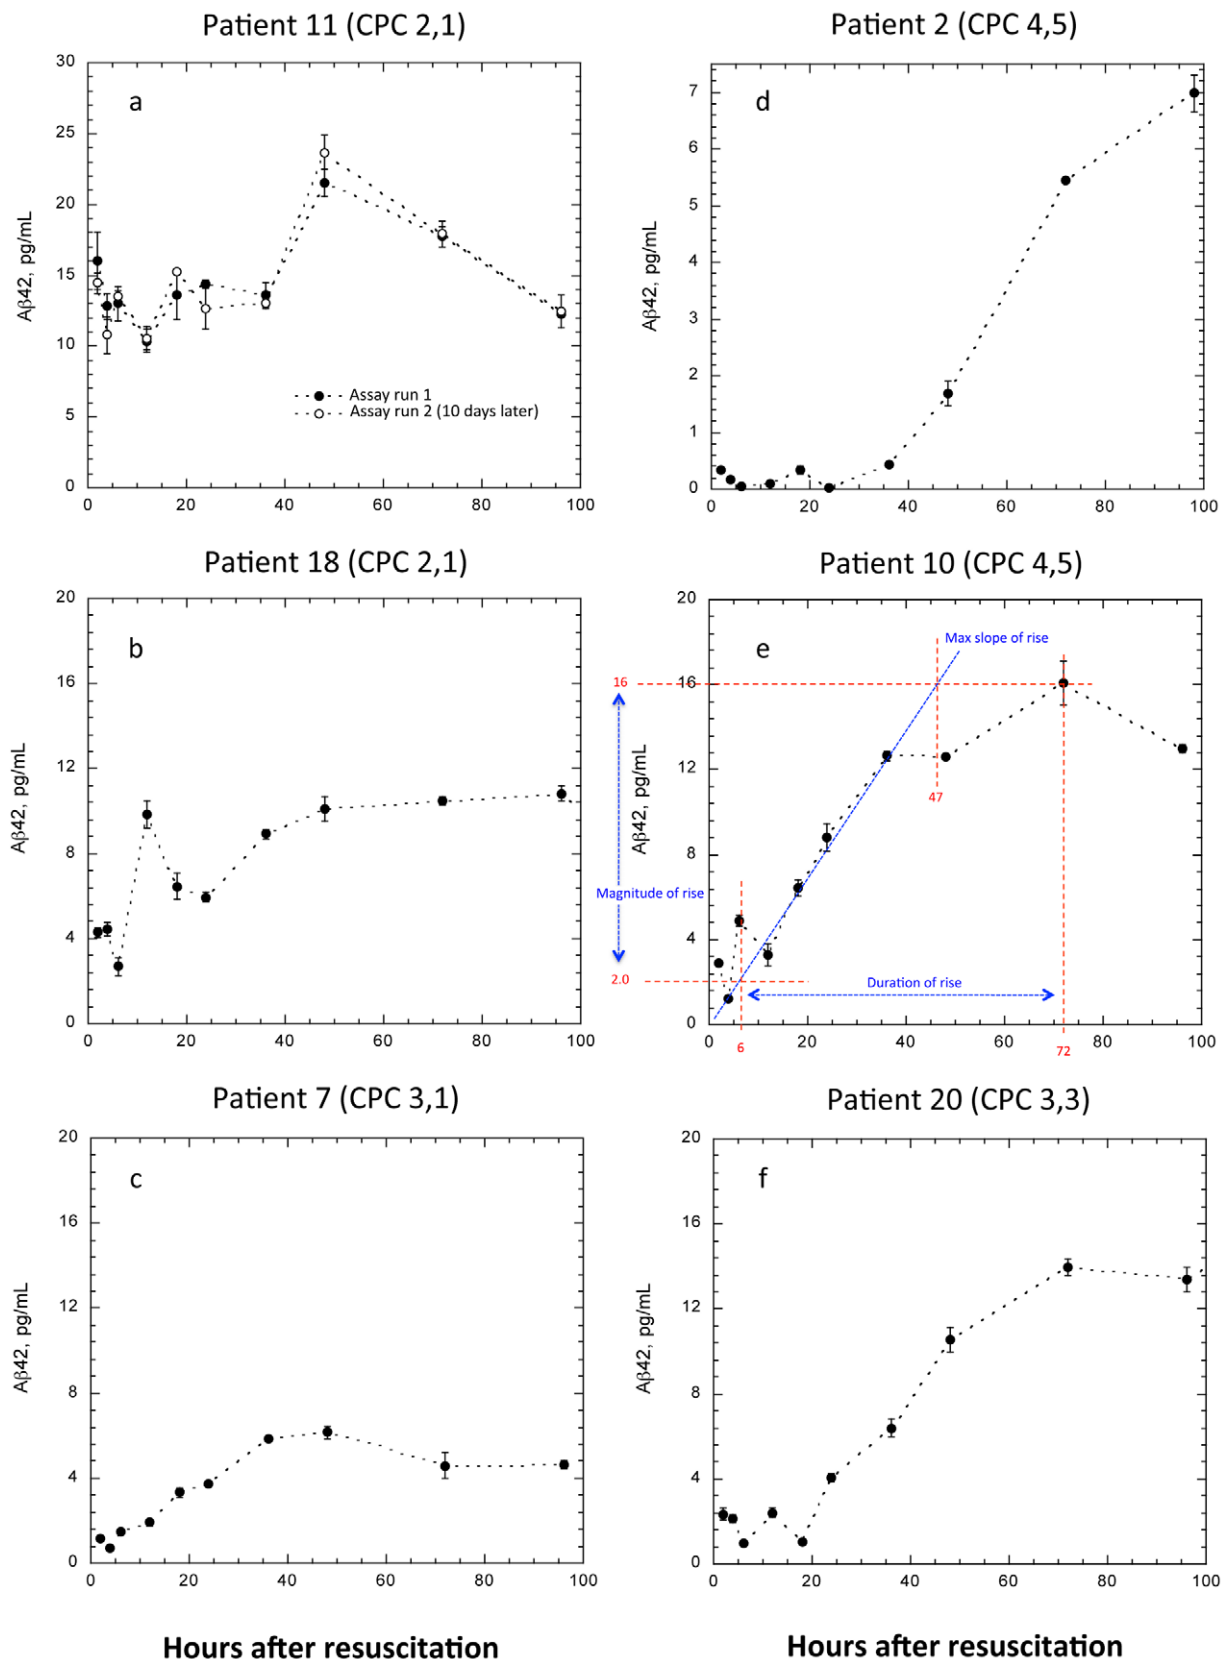

**Figure 2. Serum A $\beta$ 42 following resuscitation from cardiac arrest.** CPC scores depicted are after discharge from the ICU and 6 months later. Panels on left (**A–C**) are profiles from patients exhibiting good outcomes, panels on the right (**D–F**) are from patients with poor outcome. (**E**) Illustration of A $\beta$ 42 profile analysis. Baseline A $\beta$ 42 was defined as the mean of the two lowest values in the initial 12 hours. The time of initial elevation was defined as the intersection between the baseline A $\beta$ 42 and the line of maximum ascension of the major elevation peak. The duration of

the A $\beta$ 42 increase was defined as the difference between time of initial elevation and time beyond which no significant further rise was observed. The magnitude and maximum slope of rise are also indicated. **(A)** Patient exhibiting smallest relative increase in A $\beta$ 42 among all patients. For confirmation, the sample set was re-assayed on a different day. **(D)** Patient with poor outcome exhibiting the largest relative increase from baseline. **(C and F)** Patients with similar baseline A $\beta$ 42 and poor cerebral outcome upon discharge from the ICU. Six months later, patient BE had recovered good cerebral function, while patient LP had not. Error bars: standard deviation of triplicate measurements.  
doi:10.1371/journal.pone.0028263.g002

described [12]. The ends of bundles of 50,000 optical fibers were polished, and one end of each bundle was etched in mild acid solution. Differential etch rates of the optical fiber core and cladding glass of the bundles caused 4.5  $\mu$ m diameter, 3.5  $\mu$ m deep wells to be formed, giving arrays of microwells across the bundles. Arrays were mounted in linear groups of eight within glass holders, spaced to correspond with microtiter plate well columns that served as rinse troughs following bead loading.

## Reagents

Paramagnetic carboxy beads (2.7  $\mu$ m, Varian) were coated with a commercially available monoclonal (Covance 6E10) directed to the N-terminus of A $\beta$ 42, and diluted to  $5 \times 10^6$  beads/mL in Tris-

BSA. Biotinylated detector was a commercially available monoclonal (Invitrogen H31L21) directed to the C-terminus, diluted to 0.1  $\mu$ g/mL in PBS with newborn calf serum, NCS (PBS/NCS). Reporter streptavidin: $\beta$ -galactosidase (S $\beta$ G) was a conjugate of purified streptavidin (Thermo Scientific) and  $\beta$ G (Sigma), diluted to 25 pM in PBS/NCS with 1 mM MgCl<sub>2</sub>.

## ELISA and imaging

Bead-sample incubations and immunocomplex labeling were conducted in conical 96 well plates (Axygen) in three steps, starting with analyte capture, incubation with biotinylated detector, and labeling with S $\beta$ G. Beads from the ELISA were loaded into microwells by centrifugation at 1,300 g for 10 minutes. Wells

**Table 1.** Characteristics of serum A $\beta$ 42 elevation profiles from resuscitated survivors of cardiac arrest during the first 96–108 hours following admission to the intensive care unit.

| Patient | Magnitude of rise (pg/mL) |      | Duration of rise (hr) |      | Rise ratios (fold increase) |      | Max slope (pg/mL/hr) |       | A $\beta$ 42 score |      |
|---------|---------------------------|------|-----------------------|------|-----------------------------|------|----------------------|-------|--------------------|------|
|         | Good                      | Poor | Good                  | Poor | Good                        | Poor | Good                 | Poor  | Good               | Poor |
| 1       |                           | 17.4 |                       |      |                             | 4.10 |                      | 0.621 |                    |      |
| 2       |                           | 6.90 |                       | 60   |                             | 70.0 |                      | 0.150 |                    | 137  |
| 3       | 11.3                      |      | 28                    |      | 4.10                        |      | 0.315                |       | 43.7               |      |
| 4       | 11.9                      |      | 25                    |      | 4.30                        |      | 0.466                |       | 41.7               |      |
| 5       |                           | 4.60 |                       | 63   |                             | 5.60 |                      | 0.242 |                    | 73.4 |
| 6       |                           | 8.60 |                       | 78   |                             | 9.60 |                      | 0.110 |                    | 96.3 |
| 7       | 5.07                      |      | 32                    |      | 6.45                        |      | 0.159                |       | 43.7               |      |
| 8       |                           | 7.10 |                       | 21   |                             | 2.45 |                      | 0.592 |                    | 31.1 |
| 9       | 9.20                      |      | 14                    |      | 6.75                        |      | 0.657                |       | 30.6               |      |
| 10      |                           | 14.0 |                       | 66   |                             | 8.00 |                      | 0.340 |                    | 88.3 |
| 11      | 9.50                      |      | 15                    |      | 1.81                        |      | 0.633                |       | 26.9               |      |
| 12      |                           | 26.7 |                       | 18   |                             | 5.45 |                      | 1.48  |                    | 51.6 |
| 13      | 6.50                      |      | 28                    |      | 14.0                        |      | 0.232                |       | 48.7               |      |
| 14      | 11.0                      |      | 55                    |      | 6.50                        |      | 0.202                |       | 72.7               |      |
| 15      | 11.0                      |      | 31                    |      | 4.90                        |      | 0.360                |       | 47.3               |      |
| 16      |                           | 13.3 |                       |      |                             | 3.00 |                      | 0.887 |                    |      |
| 17      | 7.20                      |      | 13                    |      | 3.13                        |      | 0.554                |       | 23.9               |      |
| 18      | 6.90                      |      | 31                    |      | 2.97                        |      | 0.276                |       | 41.1               |      |
| 19      |                           | 8.80 |                       |      |                             | 3.20 |                      | 0.587 |                    |      |
| 20      |                           | 12.3 |                       | 56   |                             | 8.70 |                      | 0.273 |                    | 77.3 |
| 21      |                           | 9.50 |                       | 72   |                             | 16.8 |                      | 0.132 |                    | 98.4 |
| 22      |                           | 7.10 |                       |      |                             | 31.7 |                      | 0.372 |                    |      |
| 23      |                           | 14.7 |                       | 33   |                             | 8.00 |                      | 0.445 |                    | 56.1 |
| 24      |                           | 7.90 |                       | 61   |                             | 4.30 |                      | 0.282 |                    | 73.5 |
| 25      |                           | 7.20 |                       | 72   |                             | 15.4 |                      | 0.141 |                    | 94.7 |
| Mean    | 8.96                      | 11.1 | 27.2                  | 54.6 | 5.49                        | 13.1 | 0.385                | 0.444 | 42.0               | 79.8 |
| P value | 0.137                     |      | 0.00091               |      | 0.095                       |      | 0.322                |       | 0.00056            |      |

Parameters were sorted on the basis of good or poor 6-month outcome. Blood sampling was terminated early for patients 1, 16, 19 and 22 for medical reasons, and rise durations could not be estimated for these patients. The A $\beta$ 42 score equals the sum of magnitude of rise, duration of rise, rise ratio and max slope.

doi:10.1371/journal.pone.0028263.t001

containing beads with labeled A $\beta$ 42 were visualized by the hydrolysis of enzyme substrate (resorufin  $\beta$ -D-galactopyranoside, RGP, Invitrogen) by  $\beta$ G into fluorescent product. RGP was introduced to the wells during array sealing just prior to imaging. Enzyme-containing wells were imaged by fluorescence microscope fitted with a CCD camera. The images were analyzed to determine the average number of label enzymes/bead (AEB) [13].

## Statistics

A $\beta$ 42 levels and changes were compared between outcome groups using unpaired t-tests in GraphPad Prism 5 (GraphPad Software Inc., La Jolla, USA).

## Results

Singulation of capture beads within microwells permits buildup of fluorescent product from a single enzyme label, making the signal from a single immunocomplex readily detectable (Figure 1A–B). The novel A $\beta$ 42 assay has a dynamic range to 250 pg/mL (Figure 1C), with limit of quantification of less than 0.04 pg/mL, enabling precise measurement of low abundance serum A $\beta$ 42 in all samples. Precise quantification of peripheral A $\beta$ 42 to subpicogram levels has not been previously possible with conventional assay methods. The extreme sensitivity of the assay also permits pre-dilution of the samples, reducing endogenous interferences that have been problematic with assays for this peptide (Figure 1D).

Figure 2 depicts representative elevation profiles for patients with good and poor 6-month outcomes. Profile parameters were: magnitude of A $\beta$ 42 rise, ratio of the peak to baseline A $\beta$ 42, slope of A $\beta$ 42 rise, and the duration over which the A $\beta$ 42 exhibited rising values (Figure 2E). The sum (A $\beta$ 42 score) of these parameters was also examined (Table 1). All patients were found to exhibit a significant time-dependent elevation of serum A $\beta$ 42. Generally, after a lag period of 10 or more hours, very clear A $\beta$ 42 elevations were observed. Elevations ranged from approximately 80% to over 70-fold, with most elevations in the range of 3–10-fold (average approximately 7-fold).

A $\beta$ 42 profile characteristics for each patient are given in Table 1, and graphed in Figure 3. There was no relationship between baseline A $\beta$ 42 and outcome ( $p = 0.53$ ). Large increases in A $\beta$ 42, as reflected by rise magnitudes and ratios, exhibited

marginal association with poor outcome (student t-test  $p = 0.137$ , 0.095 respectively), while a long duration of rise was associated with poor outcome ( $p < 0.001$ ). Slope and total area under the curve (AUC) were not significant ( $p = 0.32$ , 0.16 respectively, later not shown). Weak association between AUC and outcome could be due to incomplete expression of the major elevation peak over the sampling interval in many cases (e.g., Figure 2D). Arbitrarily summing the profile parameters further enhanced discrimination ( $p < 0.0006$ ), giving 90% positive and negative predictive values for 6-month outcome using a cut point of 50. Age and gender did not influence the results ( $p > 0.35$  for all comparisons).

## Discussion

To our knowledge, these data are the first to link hypoxia with acute elevations in serum A $\beta$ 42 levels in living humans. These data corroborate earlier results from animal models, which all suggest a direct relationship between hypoxia and up-regulated amyloidogenic APP-processing [7,8,9]. While we make no claim of the observed changes being brain-specific, the data show that circulatory failure with hypoxia dramatically increases A $\beta$ 42 levels in blood. Induced A $\beta$ 42 production due to hypoxia appears to be the most likely explanation for the results, but increased release from cerebral tissues due to blood-brain barrier breakdown or reduced clearance of the peptide cannot be excluded. The magnitude of the increase is associated with clinical outcome, which in turn probably reflects the severity of the ischemic episode.

A limitation of the study is the lack of a control group. However, earlier results show that the day-to-day variability in A $\beta$ 42 levels normally is very low [17]. Moreover, the association of the SiMoA A $\beta$ 42 results with clinical outcome suggests a direct relationship between the ischemic episode and A $\beta$ 42 levels which is not secondary to the standardized treatment all patients received.

Although there are many differences between acute hypoxia due to cardiac arrest and age-related changes in the cerebrovasculature, it is tempting to speculate that hypoxia induced by arteriolosclerosis and/or lipohyalinosis may play a role in AD pathogenesis by a direct effect on A $\beta$  levels in the brain. On top of this, lowering of pH in hypoxic tissues would further stimulate A $\beta$  oligomerization and aggregation as readily observed in the test tube [18,19,20]. A direct effect of hypoxia on A $\beta$  production may provide a putative mechanism for the mounting evidence from

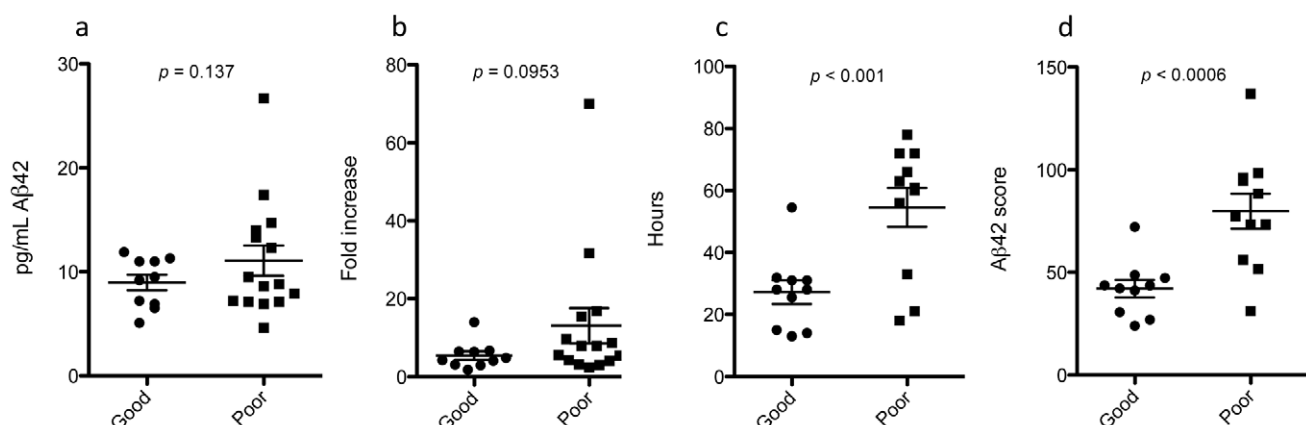

**Figure 3. Features of A $\beta$ 42 elevation profiles were compared with 6-month overall cerebral outcome. (A)** Magnitude of A $\beta$ 42 rise; **(B)** ratio of maximum to baseline A $\beta$ 42; **(C)** duration of major A $\beta$ 42 rise; **(D)** sum of A to C plus maximum slope of A $\beta$ 42 rise. Error bars are the standard error of the means.

doi:10.1371/journal.pone.0028263.g003

epidemiological studies linking cerebrovascular risk factors with AD [3,4,5,6]. It may also help to explain the recently described association of sleep apnea-induced hypoxia with dementia [21].

The data indicate that the SiMoA A $\beta$ 42 assay represents a breakthrough in analytical capability for extremely sensitive and reproducible A $\beta$ 42 measurement in serum and plasma. The assay allows highly sensitive (limit of quantification 0.032 pg/mL) and precise quantification of A $\beta$ 42 in biological fluids. Current immunoassays for measurement of A $\beta$ 42 in plasma are based on the ELISA [22,23,24] or the Luminex [25] techniques. In addition to lower analytical sensitivity, these immunoassays are hampered by low recovery of spiked A $\beta$ 42 into plasma or serum, and as a result the measured concentration of A $\beta$ 42 increases when the plasma sample is diluted [25]. These phenomena are due to matrix effects, probably by interaction and binding of A $\beta$ 42 to plasma proteins. This means that unrelated plasma proteins contribute to the concentration interpreted to come from A $\beta$ 42 in this type of assay. The immunoassay presented here showed highly linear dilution characteristics, together with a recovery of around 100%, suggesting that it gives a very accurate measure of the A $\beta$ 42 concentration. This is likely because the interference from plasma

proteins is lost when samples are pre-diluted 1:4 prior to measurement. Because the assay has such high sensitivity, pre-diluting the samples does not compromise the capability of the method to precisely measure low abundance A $\beta$ 42. A highly accurate and specific assay for measurement of A $\beta$ 42 in blood will be of major importance both for pathogenic studies on AD disease mechanisms, and to monitor an effect on A $\beta$  metabolism of novel therapeutic compounds in clinical trials, a hypothesis that will be tested in future studies.

## Acknowledgments

We thank Rita Persson for skillful technical assistance.

## Author Contributions

Conceived and designed the experiments: HZ KB EM SR DW. Analyzed the data: HZ DW KB. Contributed reagents/materials/analysis tools: LS LC DW. Wrote the paper: HZ DW KB. Performed the ELISA measurements: LS GP PP EF. Performed the SiMoA measurements: DF CK TC RM AR BP KM DR DD. Performed the image analysis: TP. Collected samples: EM SR.

## References

- Blennow K, de Leon MJ, Zetterberg H (2006) Alzheimer's disease. *Lancet* 368: 387–403.
- Bertram L, Lill CM, Tanzi RE (2010) The genetics of Alzheimer disease: back to the future. *Neuron* 68: 270–281.
- Hooshmand B, Solomon A, Karcholt I, Leiviska J, Rusanen M, et al. (2010) Homocysteine and holotranscobalamin and the risk of Alzheimer disease: a longitudinal study. *Neurology* 75: 1408–1414.
- Li J, Wang YJ, Zhang M, Xu ZQ, Gao CY, et al. (2011) Vascular risk factors promote conversion from mild cognitive impairment to Alzheimer disease. *Neurology* 76: 1485–1491.
- Solomon A, Kivipelto M, Wolozin B, Zhou J, Whitmer RA (2009) Midlife serum cholesterol and increased risk of Alzheimer's and vascular dementia three decades later. *Dement Geriatr Cogn Disord* 28: 75–80.
- Guo X, Pantoni L, Simoni M, Bengtsson C, Bjorkelund C, et al. (2009) Blood pressure components and changes in relation to white matter lesions: a 32-year prospective population study. *Hypertension* 54: 57–62.
- Koike MA, Green KN, Blurton-Jones M, Laferla FM (2010) Oligemic hypoperfusion differentially affects tau and amyloid- $\beta$ . *Am J Pathol* 177: 300–310.
- Guglielmotto M, Aragno M, Autelli R, Giliberto L, Novo E, et al. (2009) The up-regulation of BACE1 mediated by hypoxia and ischemic injury: role of oxidative stress and HIF1 $\alpha$ . *J Neurochem* 108: 1045–1056.
- Wang X, Xing A, Xu C, Cai Q, Liu H, et al. (2010) Cerebrovascular hypoperfusion induces spatial memory impairment, synaptic changes, and amyloid-beta oligomerization in rats. *J Alzheimers Dis* 21: 813–822.
- Qi JP, Wu H, Yang Y, Wang DD, Chen YX, et al. (2007) Cerebral ischemia and Alzheimer's disease: the expression of amyloid-beta and apolipoprotein E in human hippocampus. *J Alzheimers Dis* 12: 335–341.
- Wisniewski HM, Maslinska D (1996) Beta-protein immunoreactivity in the human brain after cardiac arrest. *Folia Neuropathol* 34: 65–71.
- Rissin DM, Fournier DR, Piech T, Kan CW, Campbell TG, et al. (2011) Simultaneous detection of single molecules and singulated ensembles of molecules enables immunoassays with broad dynamic range. *Anal Chem* 83: 2279–2285.
- Rissin DM, Kan CW, Campbell TG, Howes SC, Fournier DR, et al. (2010) Single-molecule enzyme-linked immunosorbent assay detects serum proteins at subfemtomolar concentrations. *Nat Biotechnol* 28: 595–599.
- Mortberg E, Zetterberg H, Nordmark J, Blennow K, Rosengren L, et al. (2011) S-100B is superior to NSE, BDNF and GFAP in predicting outcome of resuscitation from cardiac arrest with hypothermia treatment. *Resuscitation* 82: 26–31.
- Jennett B, Bond M (1975) Assessment of outcome after severe brain damage. *Lancet* 1: 480–484.
- Cummins RO, Chamberlain D, Hazinski MF, Nadkarni V, Kloeck W, et al. (1997) Recommended guidelines for reviewing, reporting, and conducting research on in-hospital resuscitation: the in-hospital 'Ustein style'. A statement for healthcare professionals from the American Heart Association, the European Resuscitation Council, the Heart and Stroke Foundation of Canada, the Australian Resuscitation Council, and the Resuscitation Councils of Southern Africa. *Resuscitation* 34: 151–183.
- Bjerke M, Portelius E, Minthon L, Wallin A, Anckarsater H, et al. (2010) Confounding factors influencing amyloid Beta concentration in cerebrospinal fluid. *Int J Alzheimers Dis* 2010 pii: 986310.
- Kirkpatrick MD, Condron MM, Teplow DB (2001) Identification and characterization of key kinetic intermediates in amyloid beta-protein fibrillogenesis. *J Mol Biol* 312: 1103–1119.
- Guo M, Gorman PM, Rico M, Chakrabartty A, Laurents DV (2005) Charge substitution shows that repulsive electrostatic interactions impede the oligomerization of Alzheimer amyloid peptides. *FEBS Lett* 579: 3574–3578.
- LeVine H, 3rd (1993) Thioflavine T interaction with synthetic Alzheimer's disease beta-amyloid peptides: detection of amyloid aggregation in solution. *Protein Sci* 2: 404–410.
- Yaffe K, Laffan AM, Harrison SL, Redline S, Spira AP, et al. (2011) Sleep-disordered breathing, hypoxia, and risk of mild cognitive impairment and dementia in older women. *Jama* 306: 613–619.
- Okereke OI, Xia W, Irizarry MC, Sun X, Qiu WQ, et al. (2009) Performance characteristics of plasma amyloid-beta 40 and 42 assays. *J Alzheimers Dis* 16: 277–285.
- Vanderstichele H, Van Kerschaver E, Hesse C, Davidsson P, Buyse MA, et al. (2000) Standardization of measurement of beta-amyloid(1–42) in cerebrospinal fluid and plasma. *Amyloid* 7: 245–258.
- Mehta PD, Pirttila T, Mehta SP, Sersen EA, Aisen PS, et al. (2000) Plasma and cerebrospinal fluid levels of amyloid beta proteins 1–40 and 1–42 in Alzheimer disease. *Arch Neurol* 57: 100–105.
- Hansson O, Zetterberg H, Vanmechelen E, Vanderstichele H, Andreasson U, et al. (2010) Evaluation of plasma A $\beta$ (40) and A $\beta$ (42) as predictors of conversion to Alzheimer's disease in patients with mild cognitive impairment. *Neurobiol Aging* 31: 357–367.
